# Supplementary material for: Dual-mode N4O3 tripodal hemi-salen Schiff base sensor for selective colorimetric detection of Ni2+ and fluorometric sensing of Zn2+: analytical applications across food, environmental, and forensic matrices
Source: Royal Society of Chemistry journal article supplement (doi:10.1039/d6ra01601d), 2026-05-14
Supplement: d6ra01601d1.pdf [file d6ra01601d1.pdf]

## SUPPORTING INFORMATION

### Dual-Mode $N_4O_3$ Tripodal Hemi-Salen Schiff Base Sensor for Selective Colorimetric Detection of $Ni^{2+}$ and Fluorometric Sensing of $Zn^{2+}$ : Analytical Applications across Food, Environmental, and Forensic Matrices

Dishen Kumar,<sup>a</sup> Srishti Dutta,<sup>a</sup> Rajat Kumar Roy,<sup>a</sup> Abhilash Pandey,<sup>a</sup>  
Vanshika Sharma,<sup>a</sup> Devanand Sahu,<sup>a</sup> Anjali Suryavanshi,<sup>b</sup> and Goutam  
Kumar Patra<sup>a\*</sup>

<sup>a</sup>Department of Chemistry, Guru Ghasidas Vishwavidyalaya, Bilaspur (C.G), India

<sup>b</sup>Department of Pharmacy, Guru Ghasidas Vishwavidyalaya, Bilaspur (C.G), India

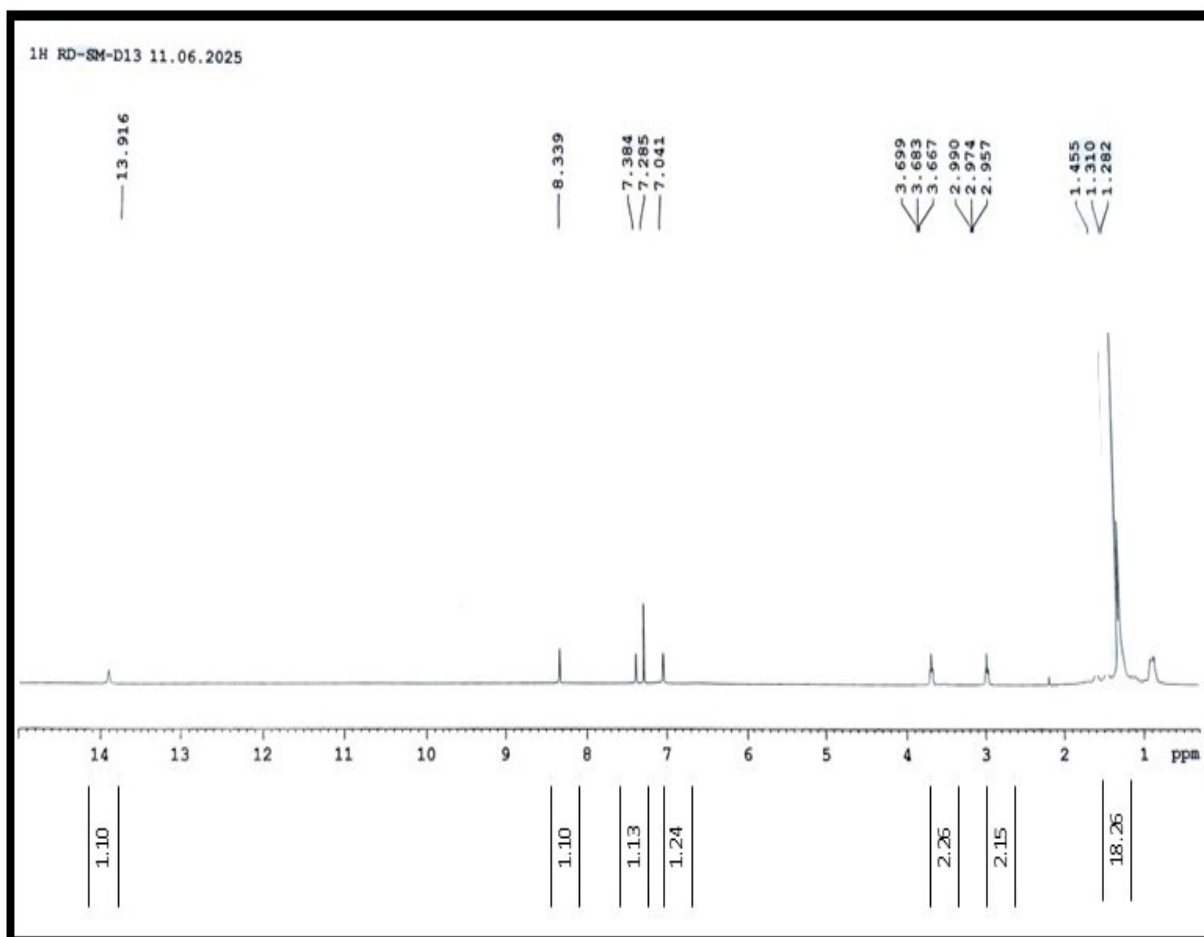

Fig. S1 <sup>1</sup>H-NMR spectra of L in  $CDCl_3$

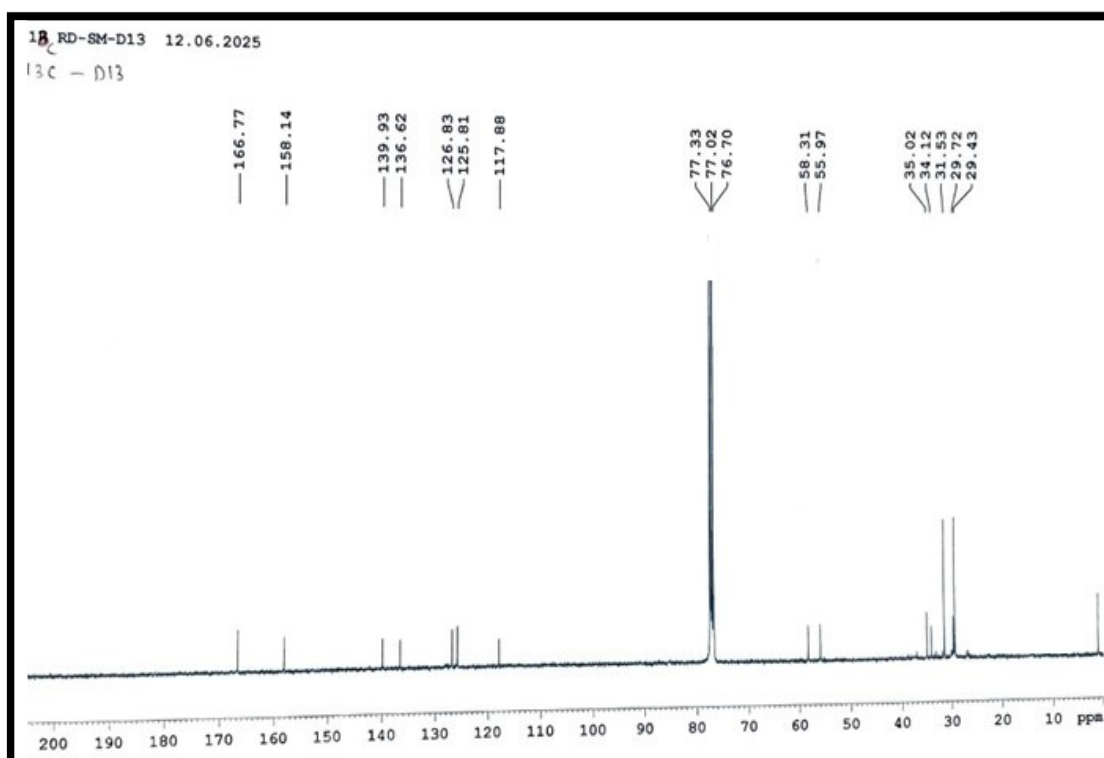

Fig. S2 <sup>13</sup>C-NMR spectra of L in CDCl<sub>3</sub>

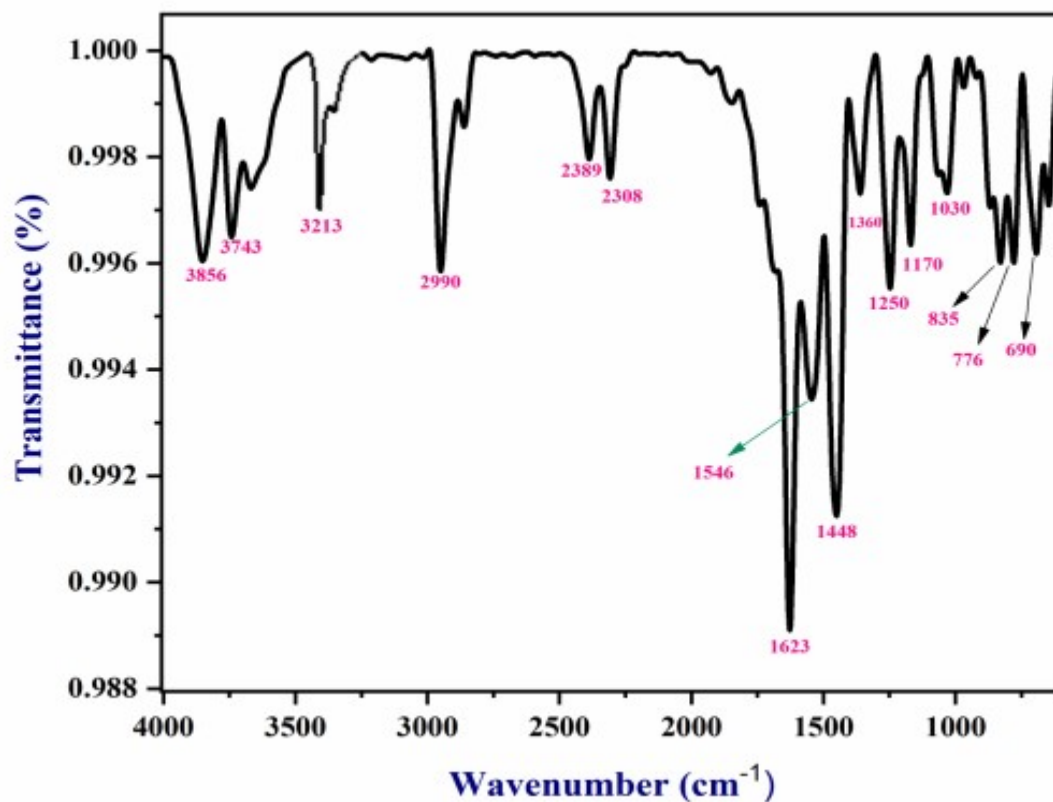

Fig. S3 FT-IR spectra of L

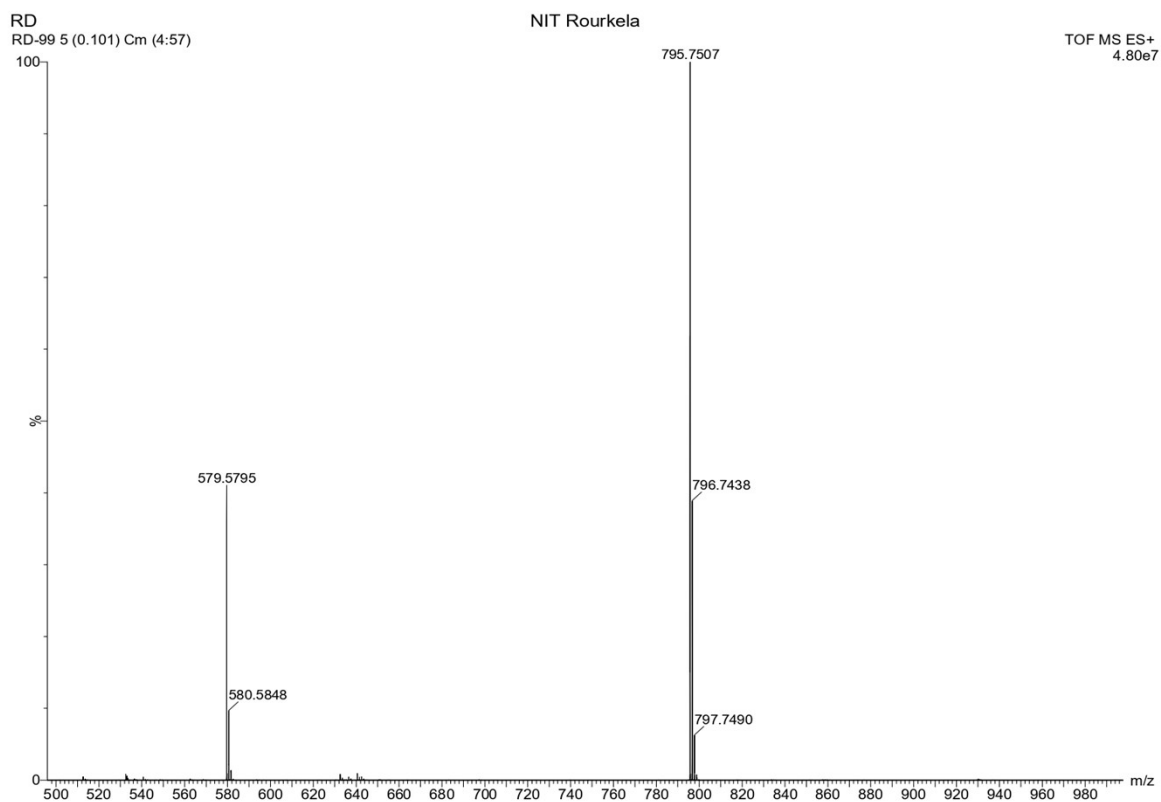

**Fig. S4** Mass spectra of **L**

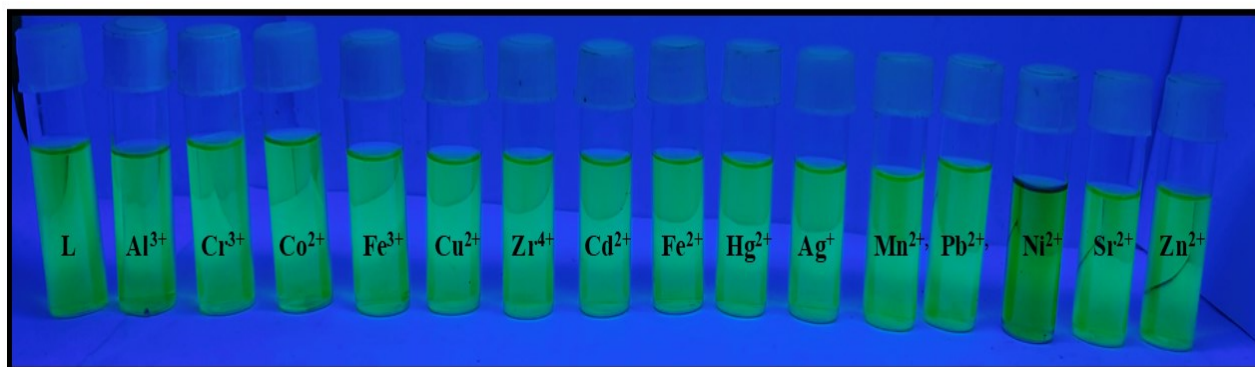

**Fig. S5** Colour change of **L** with different metal ions under UV light.

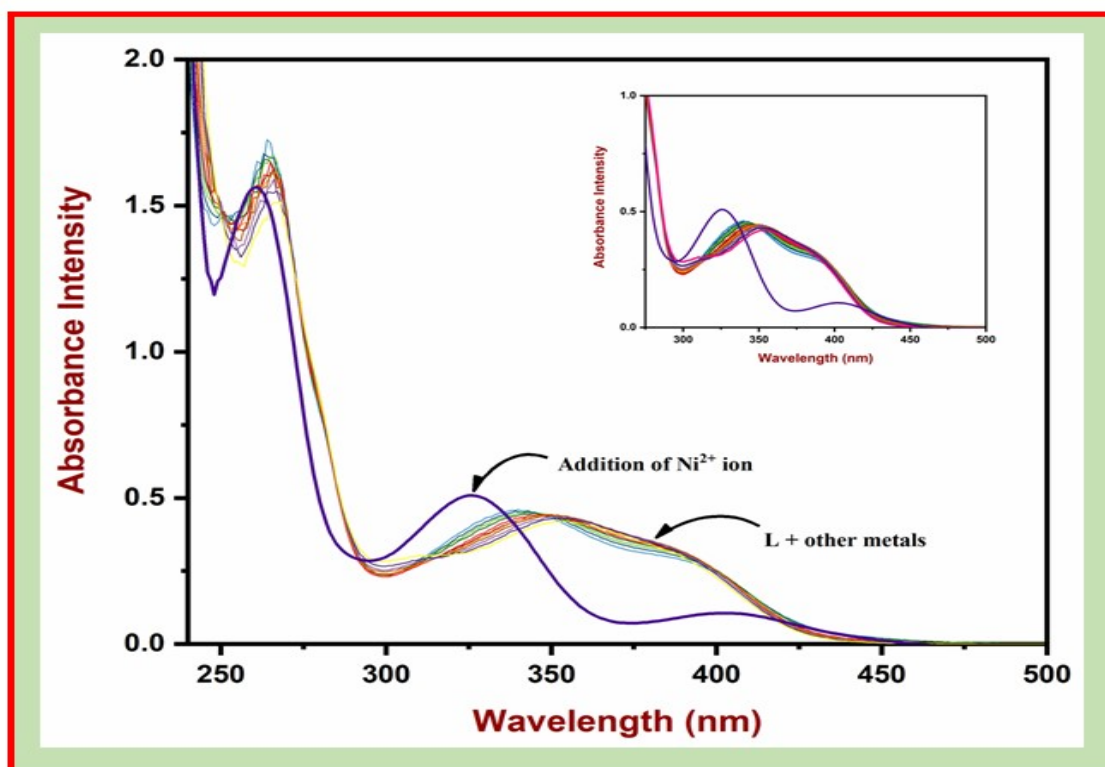

**Fig. S6** UV-Vis spectra of **L** (10 mM in CH<sub>3</sub>OH-H<sub>2</sub>O;1:1, v/v) in presence of different metal ions (Al<sup>3+</sup>, Cr<sup>3+</sup>, Co<sup>2+</sup>, Fe<sup>3+</sup>, Cu<sup>2+</sup>, Zr<sup>4+</sup>, Cd<sup>2+</sup>, Fe<sup>2+</sup>, Hg<sup>2+</sup>, Ag<sup>+</sup>, Mn<sup>2+</sup>, Pb<sup>2+</sup>, Ni<sup>2+</sup>, Sr<sup>2+</sup> and Zn<sup>2+</sup>)

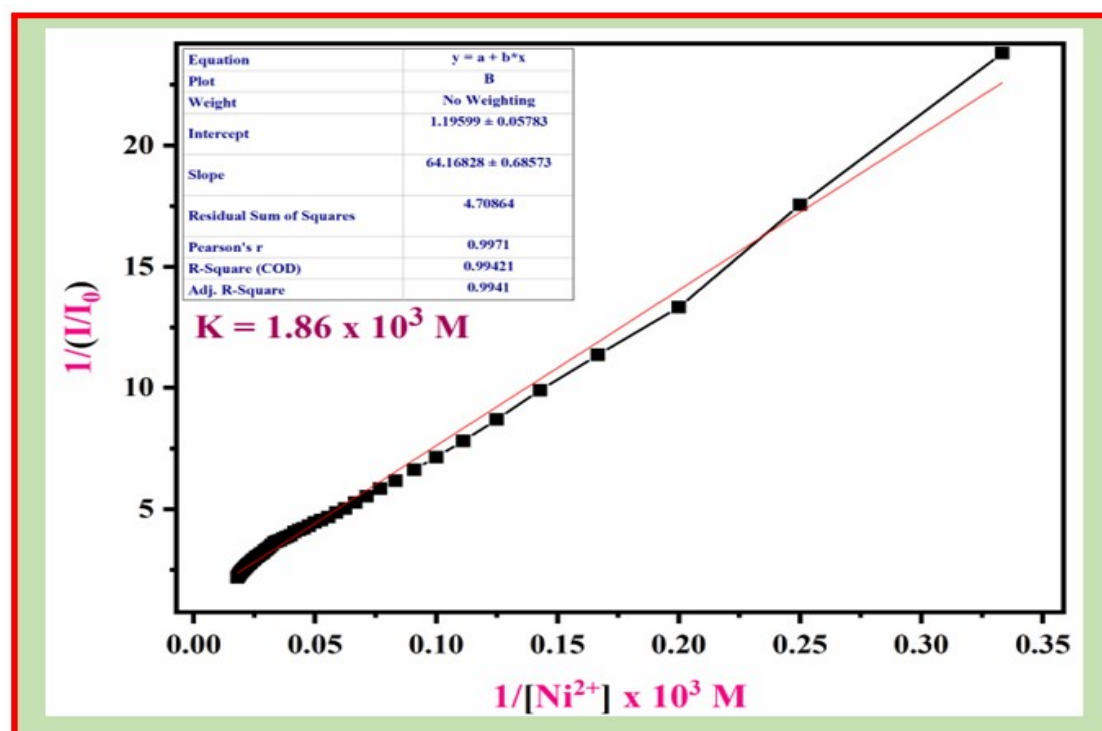

**Fig. S7** Association constant of **L** for Ni<sup>2+</sup> from UV-absorption data

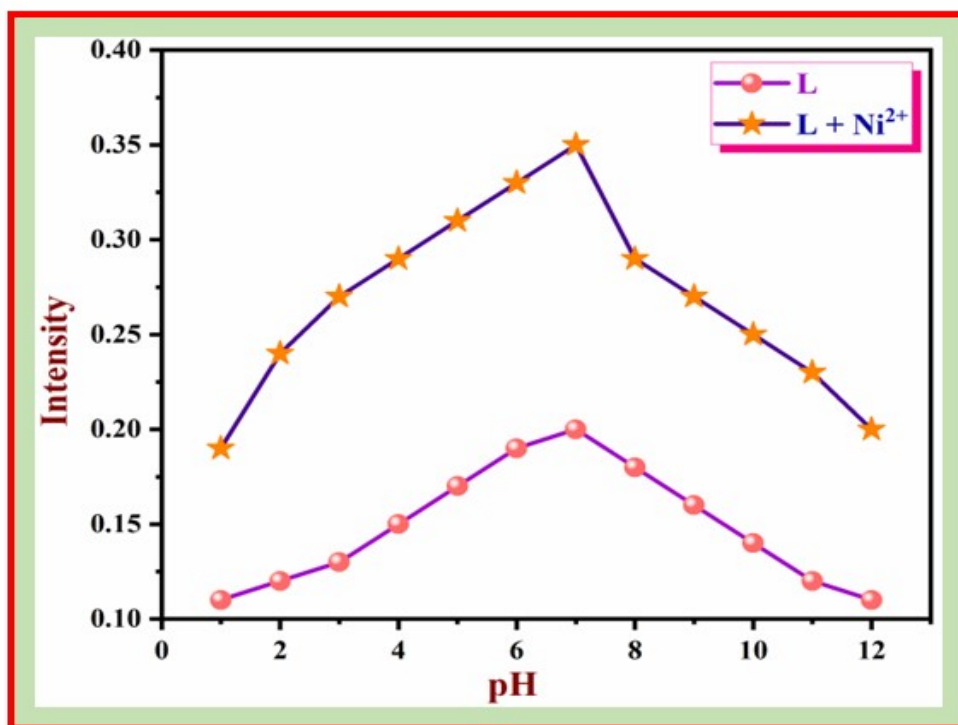

Fig. S8 Effect of pH on L and L-Ni<sup>2+</sup> in UV-Vis and absorbance spectroscopy.

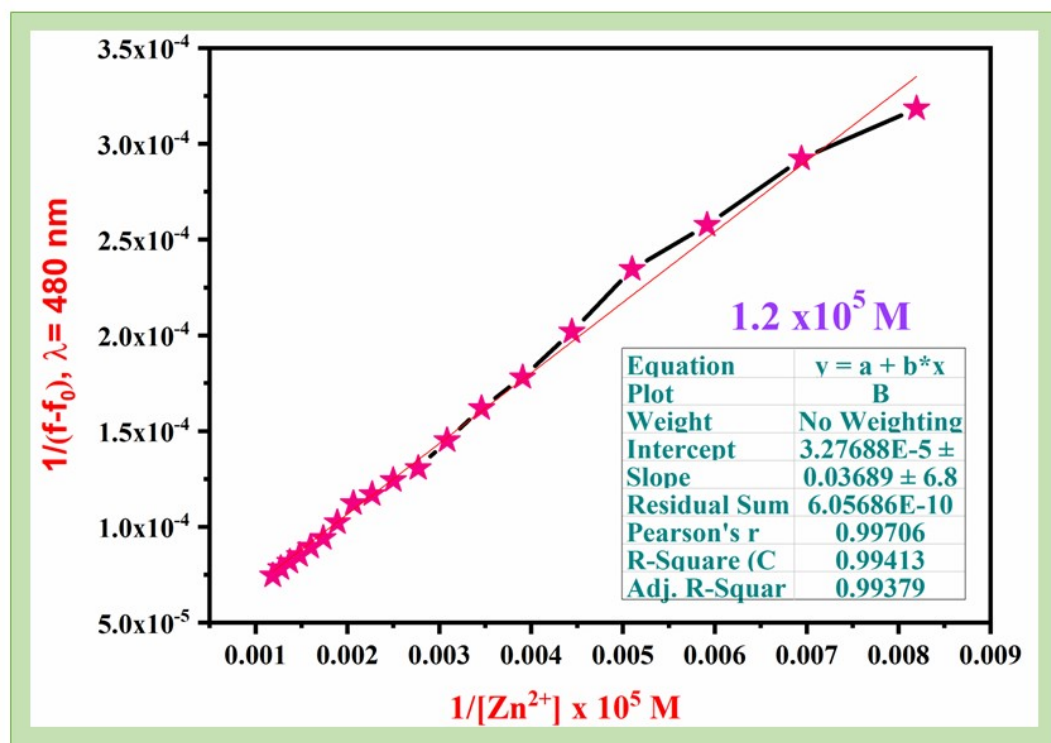

Fig. S9 Association constant of L for Zn<sup>2+</sup> from fluorescence data

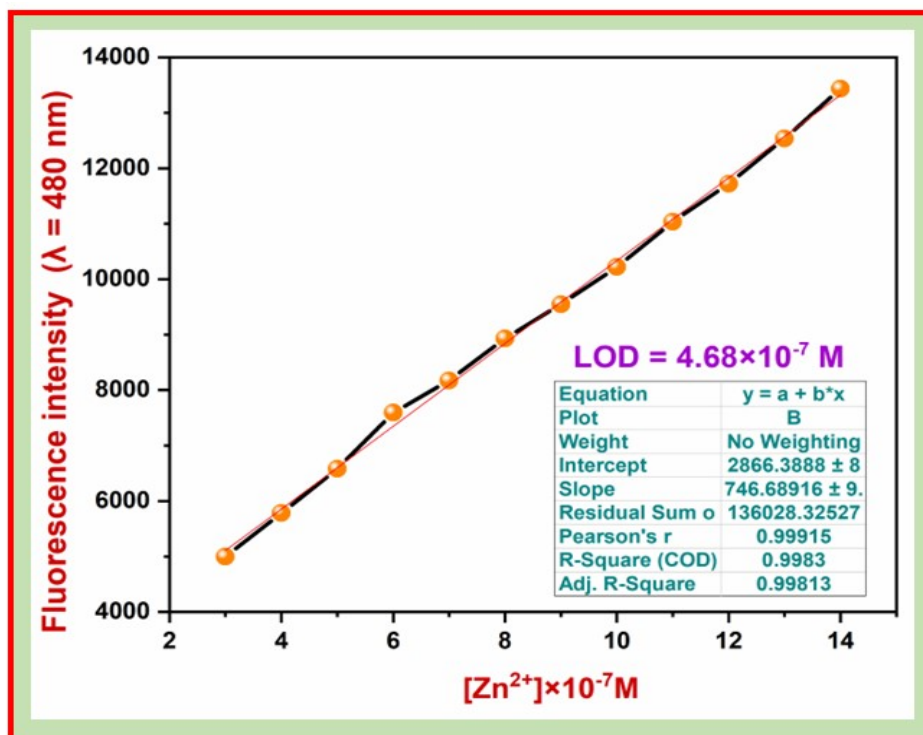

**Fig. S10** Detection limit of **L** for  $\text{Zn}^{2+}$  by emission titration method

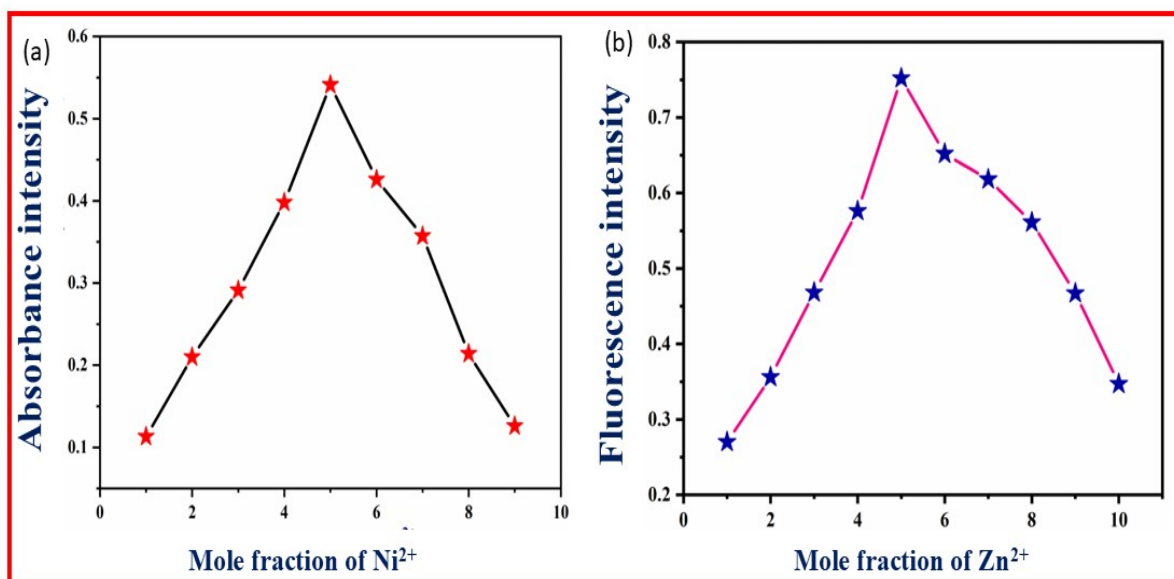

**Fig. S11** (a) Job's plot measurement of **L** for  $\text{Ni}^{2+}$  by UV-Vis analysis and (b) for  $\text{Zn}^{2+}$  by fluorometric analysis

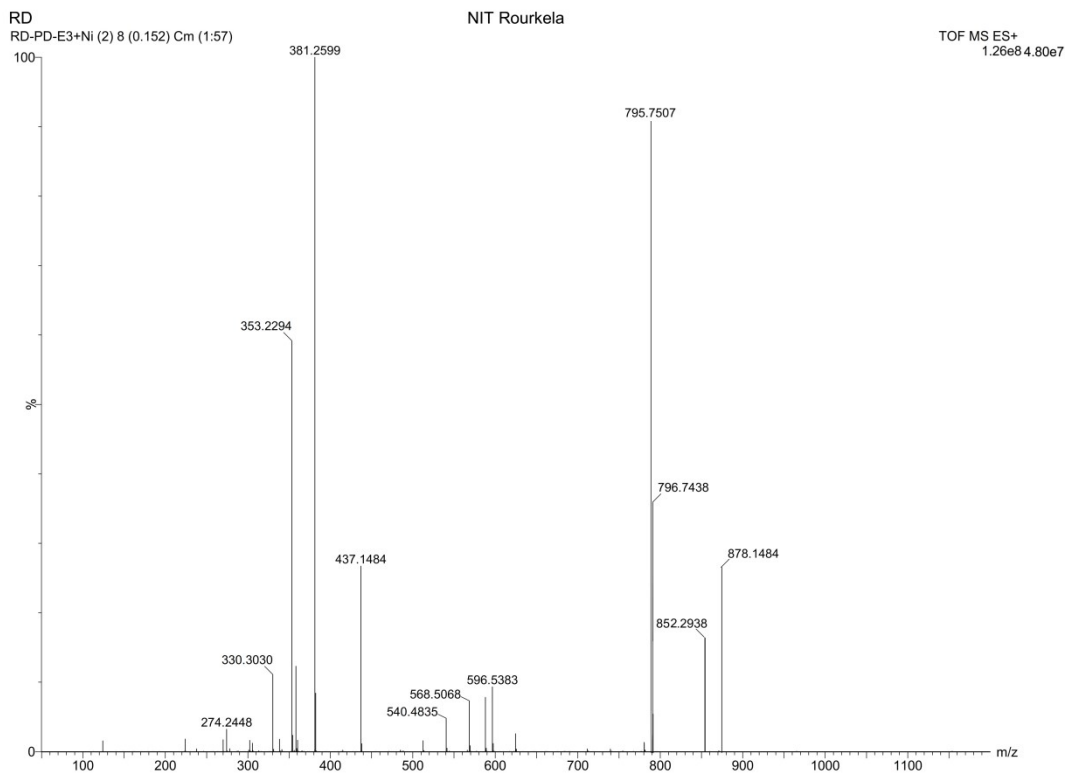

**Fig. S12** ESI-mass spectra of  $L-Ni^{2+}$  adduct

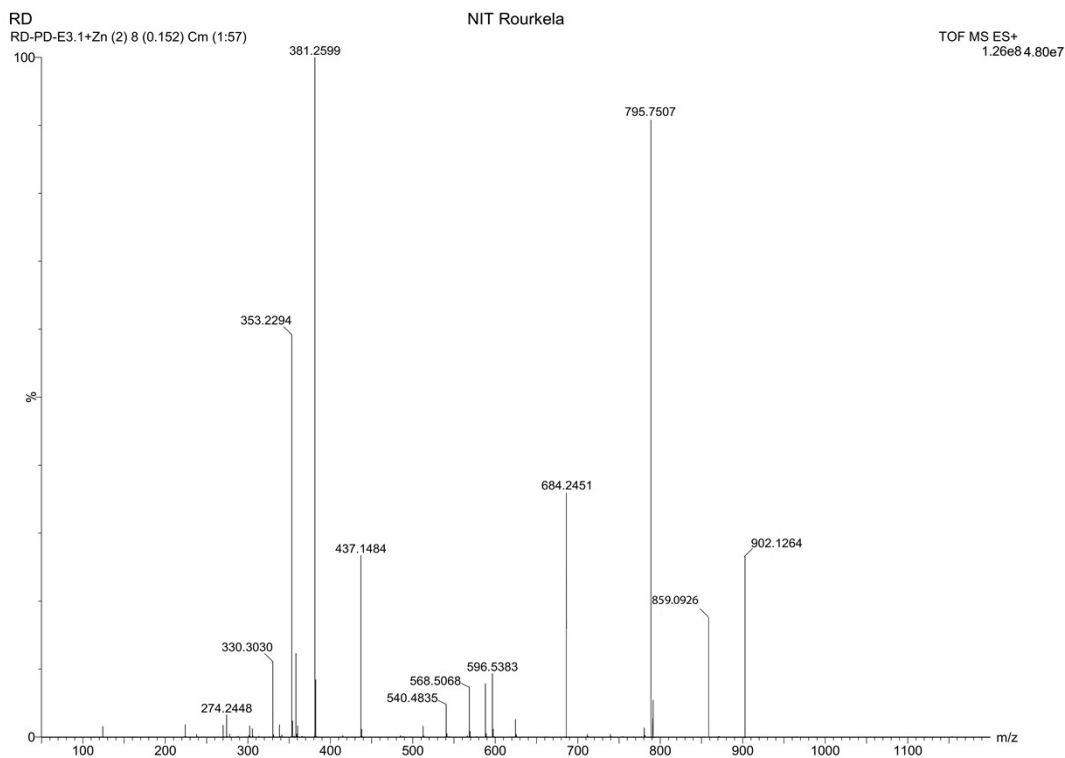

**Fig. S13** ESI-mass spectra of  $L-Zn^{2+}$  adduct

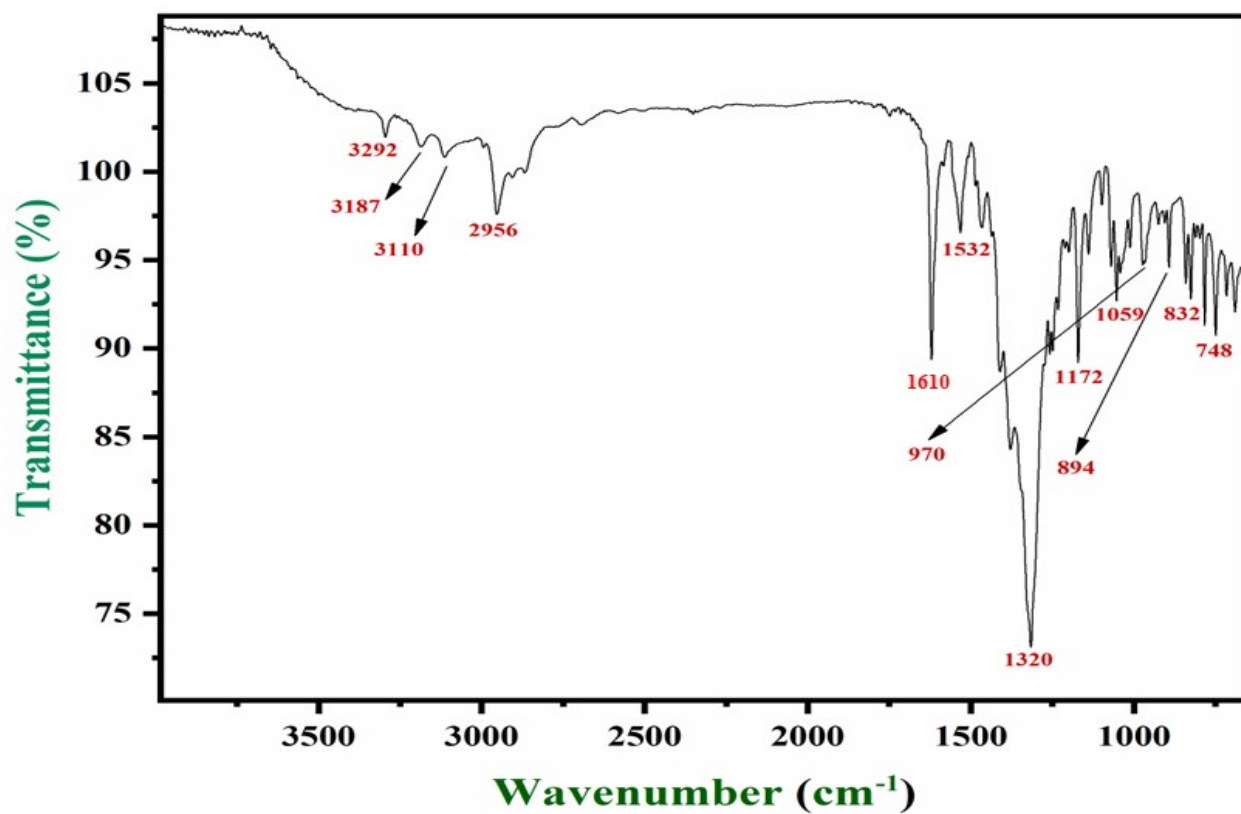

Fig. S14 FT-IR spectra of L-Ni<sup>2+</sup> adduct

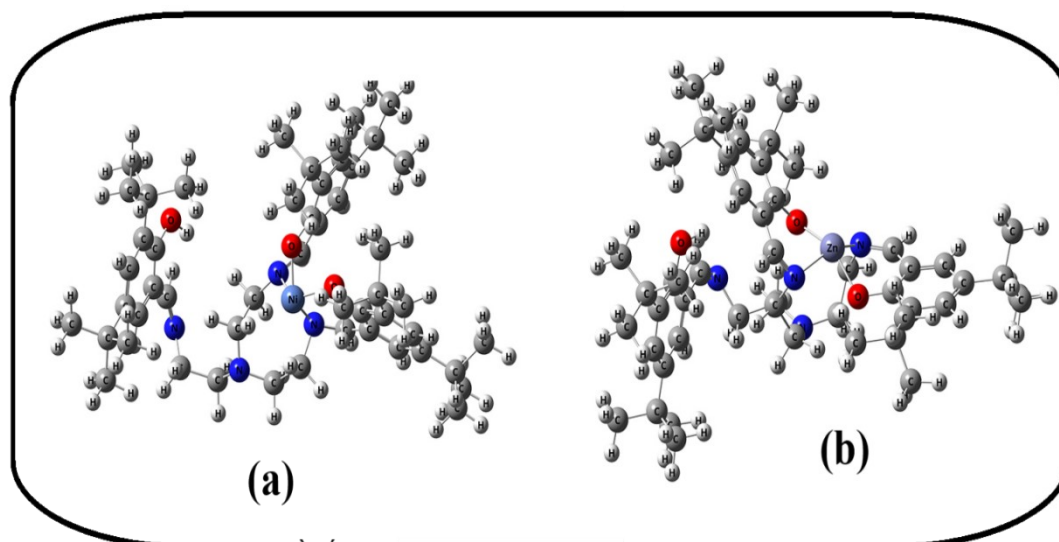

Fig. S15 DFT optimized structures of (a) L-Ni<sup>2+</sup> and (b) L-Zn<sup>2+</sup> adducts.
